# Supplementary material for: Fabrication and characterization of electrospun polycaprolactone/Urechis unicinctus derived-ECM composite scaffolds for small-diameter vascular grafts
Source: Royal Society of Chemistry journal article supplement (doi:10.1039/d5ra04406e), 2025-01-01
Supplement: d5ra04406e1.pdf [file d5ra04406e1.pdf]

## **Supplementary data**

**Fabrication and characterization of electrospun polycaprolactone/*urechis uncinatus* derived-ECM composite scaffolds for small-diameter vascular grafts**

Supplementary figures

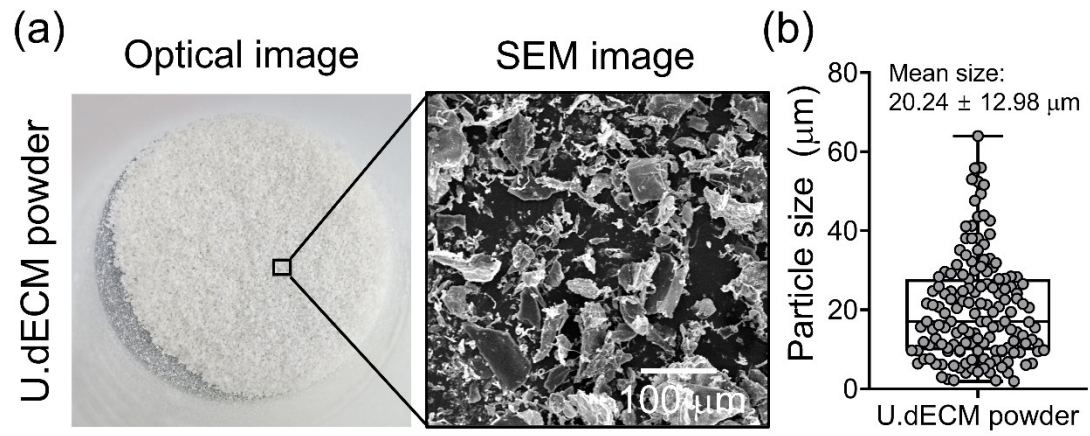

**Figure S1.** (a) Optical and SEM images of lyophilized U.dECM powder. (b) Particle size analysis of U.dECM powder ( $n = 150$ ). Scale bars: SEM images = 100  $\mu\text{m}$ .

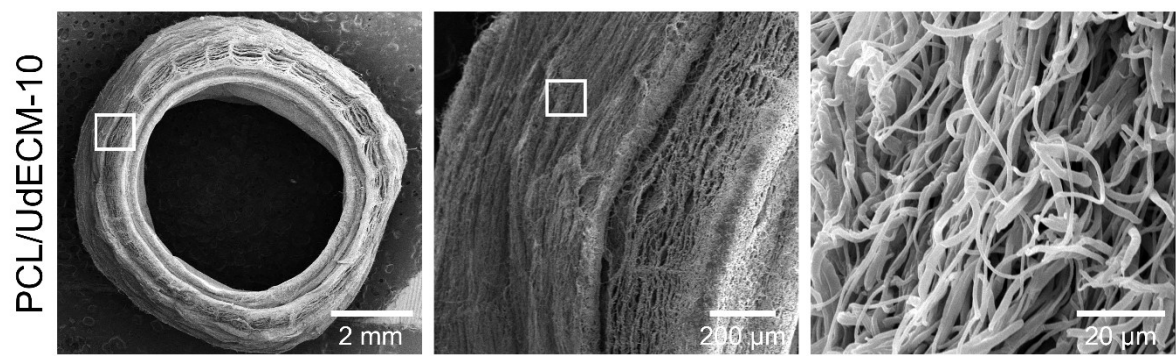

**Figure S2.** SEM images of the cross-sectional morphology of the PCL/UdECM-10 tubular scaffold at different magnifications. Scale bars: left panel = 2 mm; middle panel = 200  $\mu\text{m}$ ; right panel = 20  $\mu\text{m}$ .

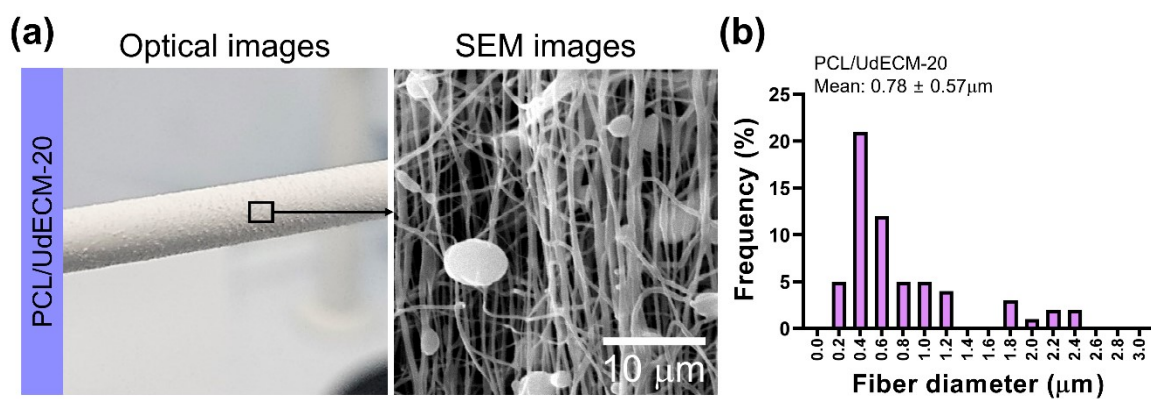

**Figure S3.** (a) Optical and SEM images of the electrospun PCL/UdECM-20 tubular scaffold. The SEM image reveals nonhomogeneous fiber morphology with frequent bead formation, indicating electrospinning instability at high UdECM content ( $> 20$  wt%). (b) Fiber diameter distribution analysis indicating a mean diameter of  $0.78 \pm 0.57 \mu\text{m}$ . Scale bars =  $10 \mu\text{m}$ .
